**Erratum**

**Kimchi, T., Reshef, M. and Terkel, J.** (2005). Evidence for the use of reflected self-generated seismic waves for spatial orientation in a blind subterranean mammal. *J. Exp. Biol.* **208**, 647-659.

In the first on-line version of this paper, published on 4 January 2005, an incorrect version of Fig. 5 was published. The error has been rectified and the current on-line version and print versions of the figure are correct.

In addition, in the first on-line version of the paper, Fig. 1 was published in black and white instead of in colour. This has also been rectified in the current on-line version and the print version is correct.
